# Supplementary material for: Extensive Lysine Methylation in Hyperthermophilic Crenarchaea: Potential Implications for Protein Stability and Recombinant Enzymes
Source: Hindawi journal article supplement (doi:10.1155/2010/106341), 2010-01-01
Supplement: f1 [file 106341.f1.pdf]

Supplementary Table 1. Methylated lysines identified in *S. solfataricus* RNA polymerase

| Protein                   | Enzyme  | Method <sup>a</sup> | Peptide sequence          | Ion Score | E value  | Quality of evidence                                                                                                         |
|---------------------------|---------|---------------------|---------------------------|-----------|----------|-----------------------------------------------------------------------------------------------------------------------------|
| RpoA'<br>Rpo1N<br>Sso0225 | trypsin | Sol<br>MALDI        | KEIYNEIDR                 | 63        | 2.4e-005 | Good MSMS - b ion series covering site of modification and many y ions, specific immonium-17 ion                            |
|                           | ArgC    | Sol<br>MALDI        | KELASTLAPGYIIER           | 77        | 2.1e-007 | Good MSMS - b ion series covering site of modification, specific immonium-17 ion                                            |
| RpoB<br>Rpo2<br>Sso0227   | trypsin | Sol<br>ESI          | IVEKTLYEMGVVPVEEVIR       | 72        | 9.2e-006 | Good MSMS with b ions either side of modification                                                                           |
|                           | ArgC    | Sol<br>MALDI        | GYKGKEYYR                 | 42        | 0.0007   | Reasonable MSMS spectrum - covers site of modification, specific immonium-17 ion                                            |
|                           | ArgC    | Sol<br>MALDI        | FLQEFKELSPEQAKR           | 45        | 0.0005   | Reasonable MSMS spectrum - no ions covering site of modification, specific immonium-17 ion                                  |
| RpoD<br>Rpo3<br>Sso0071   | trypsin | Gel<br>ESI          | DIKSEDPSVVPISGDIPVLLGTNQK | 82        | 4.9e-08  | No ions covering this part of peptide, so assuming increase in mass due to Me on K, but solid match to peptide sequence     |
| RpoE'<br>Rpo7<br>Sso0415  | trypsin | Sol<br>MALDI        | LEWITQTKK                 | 42        | 0.0028   | Good MSMS covering site of modification, specific immonium-17 ion                                                           |
|                           | trypsin | Sol<br>MALDI        | IPPNEFGKPLNEIALNELR       | 124       | 1.6e-011 | Good MSMS covering site of modification, specific immonium-17 ion                                                           |
|                           | ArgC    | Sol<br>MALDI        | QPYLGKLEWITQTKK           | 100       | 1.2e-009 | Good MSMS covering site of modification, specific immonium-17 ion                                                           |
|                           | ArgC    | Sol<br>MALDI        | QPYLGKLEWITQTKK           | 40        | 0.0013   | Reasonable MSMS, specific immonium-17 ion for 2 monomethylations                                                            |
|                           | ArgC    | Sol<br>MALDI        | GIIFGEKSKKVIQKGDKVR       | 98        | 1.8e-009 | Good MSMS covering sites of modification, specific immonium-17 ion                                                          |
|                           | ArgC    | Sol<br>MALDI        | GIIFGEKSKKVIQKGDKVR       | 55        | 2.5e-005 | can't distinguish which of adjacent K in 2 monomethylated peptide but specific immonium-17 ion for 2 monomethylated species |

|                          |         |              |                                         |     |          |                                                                                      |
|--------------------------|---------|--------------|-----------------------------------------|-----|----------|--------------------------------------------------------------------------------------|
| RpoF<br>Rpo4<br>Sso0751  | trypsin | Sol<br>MALDI | TYTSEDIQKIIDIIR                         | 63  | 1.7e-005 | Good MSMS covering site of modification, specific immonium-17 ion                    |
|                          | trypsin | Sol<br>MALDI | CDAESAQK <b>V</b> IEELSNIVSR            | 31  | 0.028    | Poor MSMS – not many peaks, specific immonium-17 ion                                 |
| RpoH<br>Rpo5<br>Sso5468  | trypsin | Sol<br>ESI   | HEVLNIDEAYKILK                          | 77  | 3.9e-006 | Good MSMS, site of modification not covered                                          |
|                          | ArgC    | Sol<br>MALDI | <b>K</b> SQLYGEVVS <b>Y</b> R           | 101 | 8.5e-010 | Good MSMS covering sites of modification, specific immonium-17 ion                   |
| RpoL<br>Rpo11<br>Sso5577 | trypsin | Gel<br>ESI   | DALLKAIENIR                             | 58  | 5.8e-005 | Good MSMS covering site of modification                                              |
|                          | trypsin | Gel<br>ESI   | GMTSHYIDEI <b>K</b> GLTK                | 40  | 0.0043   | Good MSMS covering site of modification                                              |
| RpoP<br>Rpo12<br>Sso5865 | trypsin | Sol<br>MALDI | TFTDEQLK <b>V</b> LPGVR                 | 88  | 6.6e-008 | Good MSMS covering site of modification, specific immonium-17 ion                    |
| Rpo13<br>Sso0396         | ArgC    | Sol<br>MALDI | KAKKAVSKK <b>V</b> KKTKK <b>K</b> KSVEG | 110 | 2.7e-011 | Good MSMS covering site of modification, specific immonium-17 ions                   |
|                          | ArgC    | Sol<br>MALDI | KAKKAVSKK <b>V</b> KKTKK <b>K</b> KSVEG | 63  | 1.4e-006 | Good MSMS covering sites of modification, specific immonium-17 ions                  |
|                          | trypsin | Sol<br>MALDI | <b>K</b> LFEDNY <b>K</b>                | 30  | 0.041    | Reasonable MSMS - b1 ion covering site of modification plus specific immonium-17 ion |

<sup>a</sup>Method abbreviations: Sol: solution digest; Gel: in-gel digest

Bold indicates site of monomethylation, Ion Score is the Mascot Ion Score, E value is the Mascot Expect value, which is a measure of the likelihood that a match is purely random.

Supplementary table 2. Methylated lysines detected in *T. tenax* proteins

|   | Protein               | Accession no. | Peptide seq           | Ion Score     | E value | Quality of evidence                                                                                                      |
|---|-----------------------|---------------|-----------------------|---------------|---------|--------------------------------------------------------------------------------------------------------------------------|
| 1 | rpoA2                 | TTX1676       | GISLKDIEK             | 19            | 0.069   | Reasonable MSMS – y ion accounting for site of modification. Unmodified peptide also present                             |
|   |                       |               | TLVEAATKGDVEPFR       | 60            | 4.5 e-6 | Good MSMS – y ion series covering site of modification                                                                   |
| 2 | rpoD<br>-             | TTX1672       | ASATAVEEGSKAENV       | 38            | 0.00064 | Good MSMS – y ion series covering site of modification                                                                   |
|   |                       |               | TTX0308               | QAFETDKYETVEK | 37      | 0.0016                                                                                                                   |
|   |                       | TTX0308       | FYDIKAK               | 34            | 0.0042  | Good MSMS – y ion series covering site of modification– unmodified peptide also present (Ion Score 19) spectra v similar |
|   |                       |               | FYDIKAK               | 38            | 0.001   | Good MSMS – y ion series covering site of modification                                                                   |
| 3 | Ribosomal protein L30 | TTX1409       | KYGWNSFEELALAFVSGEIER | 53            | 1.3 e-5 | Good MSMS – b1 ion covering modification                                                                                 |
|   |                       |               | IVGDKPLTLDHLKK        | 23            | 0.0097  | Reasonable MSMS – 1 site of modification covered, coverage of alternative site (K5) refutes modification at K5           |
| 4 | hypothetical          | TTX1876       | EYTP EEIAK            | 41            | 0.00064 | Good MSMS – y ion series covering modification – unmodified peptide also present (Ion Score 43)                          |
|   |                       |               | VAIVKAQLTR            | 21            | 0.032   | Reasonable MSMS - unmodified peptide also present (Ion Score 17 (19=Ident))                                              |
| 5 | Conserved             | TTX0588       | INVEKIVK              | 32            | 0.0045  | Reasonable MSMS – b ion series covering mod                                                                              |

|    |                        |         |                      |    |         |                                                                                                  |
|----|------------------------|---------|----------------------|----|---------|--------------------------------------------------------------------------------------------------|
|    | hypothetical           |         |                      |    |         |                                                                                                  |
| 6  | nusA                   | TTX1674 | VTKSPSGNLVAITTVAPSDK | 66 | 3.1 e-5 | Good MSMS – unmodified peptide also present (Ion Score 51) and dimethylated - see below          |
|    |                        |         | VTKSPSGNLVAITTVAPSDK | 49 | 0.00056 | Good MSMS                                                                                        |
|    |                        |         | SQAALAVGKGGNNVR      | 33 | 0.0042  | Reasonable MSMS – covering site of modification - unmodified peptide also present (Ion Score 60) |
| 7  | Malate dehydrogenase   | TTX1427 | FQQSVEAISK           | 52 | 6.7 e-7 | Good MSMS                                                                                        |
|    |                        |         | IVLIDIIK             | 28 | 0.0068  | Reasonable MSMS                                                                                  |
| 8  | sdhB/frdB              | TTX0863 | ISVLDVLLK            | 25 | 0.018   | Reasonable MSMS                                                                                  |
| 9  | ferredoxin             | TTX0985 | AKYGIQVDPLPPS        | 24 | 0.019   | Reasonable MSMS                                                                                  |
| 10 | Conserved hypothetical | TTX1408 | VSTGIKELDEALEGGIPK   | 60 | 2.9 e-6 | Good MSMS - unmodified peptide also present (Ion Score 72)                                       |
|    |                        |         | KEPEAMPQIVVIDIFGLLK  | 53 | 7.7 e-7 | Good MSMS - unmodified peptide also present (Ion Score 65)                                       |
|    |                        |         | QLGMDFEK             | 28 | 0.008   | So-so MSMS - unmodified peptide also present (Ion Score 43)                                      |
|    |                        |         | KYSYQLK              | 28 | 0.017   | So-so MSMS – immonium ion -17 present -unmodified peptide also present (Ion Score 28)            |
| 11 | hypothetical           | TTX1576 | KLQQITSLLK           | 47 | 8.4 e-5 | Good MSMS b ion series covering modification 2Me spectrum similar                                |
|    |                        |         | KLQQITSLLK           | 25 | 0.011   |                                                                                                  |
|    |                        |         | KWFFEEAVPR           | 44 | 0.00019 | Good MSMS                                                                                        |
|    |                        |         | SELITKGEK            | 26 | 0.15    | Reasonable MSMS                                                                                  |

|    |                                               |         |                                  |                   |                   |                                                                  |
|----|-----------------------------------------------|---------|----------------------------------|-------------------|-------------------|------------------------------------------------------------------|
|    |                                               |         | LAKEEVELLK (mono & di)           | 27                | 0.015             | Mono and diMe – similar reasonable spectra                       |
| 12 | Putative dehydrogenase                        | TTX0535 | AAALINYIDSIFVK                   | 62                | 3 e-1.1           | Good MSMS                                                        |
|    |                                               |         | KVVESITQYLEGR (mono & di)        | 92 (m)<br>35 (di) | 4.9 e-9<br>0.0016 | Good MSMS<br>Reasonable MSMS                                     |
| 13 | hypothetical                                  | TTX1565 | DVEEELSKLPVDVSR                  | 34                | 0.0014            | Good MSMS – y ion series covering modification                   |
| 14 | Conserved hypothetical                        | TTX2090 | ALGAEVEQLK                       | 34                | 0.0025            | Reasonable MSMS - unmodified peptide also present (Ion Score 14) |
|    |                                               |         | EVAGAVIKEGDLSEAPVAVQFK           | 27                | 0.0029            | Reasonable MSMS                                                  |
| 15 | Conserved hypothetical                        | TTX1155 | TGAPIYVADTLGSLTEDASQYIQ<br>PPSGK | 73                | 7.2 e-8           | Good MSMS                                                        |
| 16 | porA                                          | TTX1785 | GIIGAIDAEYGK                     | 45                | 0.00022           | Good MSMS                                                        |
|    |                                               |         | AIKGEYGDWIVLL                    | 25                | 0.011             | Reasonable MSMS                                                  |
| 17 | Gsp putative type II secretion system protein | TTX0896 | AELLQALADKGVDAEAVAEAVR           | 59                | 1.7 e-6           | Good MSMS                                                        |
| 18 | Rfc small subunit                             | TTX1851 | IKLTEDGIDAIYEISQGD MR            | 30                | 0.002             | Reasonable MSMS                                                  |
| 19 | Eif-1A                                        | TTX0636 | GYGEVIDNLDKLA                    | 46                | 0.00011           | Good MSMS – y ion series covering modification                   |
| 20 | Conserved hypothetical                        | TTX2059 | LSAILVK                          | 24                | 0.033             | So-so MSMS                                                       |
| 21 | aEF-1 alpha subunit                           | TTX0013 | TGQTIEQKPQFIK                    | 42                | 0.0005            | Good MSMS – covering site of modification                        |
|    |                                               |         | TGQTIEQKPQFIK                    | 19                | 0.068             | Reasonable MSMS                                                  |

|    |                                            |         |                                 |    |         |                                                                                                  |
|----|--------------------------------------------|---------|---------------------------------|----|---------|--------------------------------------------------------------------------------------------------|
|    |                                            |         | TIAAGQIVEIK <b>PAK</b> VEIK     | 35 | 0.00093 | reasonable MSMS – covering site of modification                                                  |
|    |                                            |         | VETGVIKPGDK <b>VIV</b> MPPAK    | 32 | 0.0026  | reasonable MSMS – covering site of modification                                                  |
| 22 | Conserved hypothetical                     | TTX0298 | <b>K</b> AVEYGLSLGAK            | 23 | 0.038   | Reasonable MSMS                                                                                  |
| 23 | lysS                                       | TTX2056 | L <b>K</b> ELQVPLK              | 35 | 0.0015  | Reasonable MSMS                                                                                  |
| 24 | Conserved hypothetical                     | TTX0105 | VLD <b>M</b> DELEKYR            | 33 | 0.0037  | Good MSMS – covering site of modification                                                        |
| 25 | Protein-L-isoaspartate O-methyltransferase | TTX0958 | E <b>K</b> LAYVSFVK             | 23 | 0.02    | Reasonable MSMS- unmodified peptide also present (Ion Score 27)                                  |
| 26 | NAD dependent dehydrogenase                | TTX1281 | SLG <b>K</b> NELETATGER         | 38 | 0.00061 | Reasonable MSMS- unmodified peptide also present (Ion Score 42)                                  |
| 27 | Hypothetical protein                       | TTX1885 | QDAADQ <b>V</b> VKMLDQPVER      | 59 | 3.6 e-6 | Good MSMS – covering site of modification                                                        |
| 28 | Putative DNA helicase                      | TTX0530 | EIA <b>K</b> LPGFGEK            | 31 | 0.0073  | Good MSMS – covering site of modification - unmodified peptide also present (Ion Score 36)       |
|    |                                            |         | LIDASSAA <b>K</b> LAAEIESTSASR  | 50 | 3.3 e-5 | Good y ion series up to site of modification, doubly charged y ions N-term to modification       |
| 29 | Conserved hypothetical                     | TTX1840 | LED <b>V</b> LKELA              | 30 | 0.007   | Reasonable MSMS – covering site of modification - unmodified peptide also present (Ion Score 36) |
|    |                                            |         | QEEIL <b>K</b> SVADLNR          | 30 | 0.0045  | Reasonable MSMS                                                                                  |
| 30 | Conserved hypothetical                     | TTX1724 | LVPSE <b>K</b> IGTPGVDGSIAIYETK | 26 | 0.0046  | Reasonable MSMS                                                                                  |

Bold indicates monomethylation of lysine, also (m), Underlining indicates dimethylation of lysine, also (di), Ion Score is the Mascot Ion Score, E value is the Mascot Expect value, which is a measure of the likelihood that a match is purely random.
